# Supplementary material
Source: publisher figshare collection journal article supplement (https://diabetesjournals.figshare.com/ndownloader/files/34172190)
Supplement: Supplementary file 1 [file 34172190]

## Sheet: Sheet1
Table S8. Associations of eQTLs (cis-pQTLs for candidate proteins) with risk factors for adult and youth-onset type 2 diabetes using PhenoScanner.
Protein	SNP	Function	Whole body fat-free mass (p value)	Whole body fat mass (p value)	Obesity/overweight (p value)	Waist hip ratio (p value)	Body fat percentage (p value)
DBNL	rs3087367	Intron	..	..	..	..	..
MANSC4	rs36138811	Intron	..	..	..	..	..
TYRO3	rs2289743	Intron	0.005635	..	..	0.00963	..
TBCE	rs10802708	Intron	1.52e-06	..	..	..	..
MRC2	rs146385050	Intron	0.0006733	0.007606	..	..	..
SHBG	rs858519	Upstream transcript variant	..	..	..	..	0.0007398
ATP1B2	rs1642762	Intron	..	..	..	..	0.0003742
PAM	rs257309	Downstream transcript variant	..	..	..	..	..
TNFRSF6B	rs1056441	Upstream transcript variant/3 prime UTR	..	2.93e-11	..	..	8.69e-12
ATF6B	rs114887538	Downstream transcript variant	3.34e-26	..	..	0.0072	0.0023
CDK2AP1	rs2510885	Upstream transcript variant/ Intron	1.41e-11	..	..	..	..
MAPK3	rs28529403	Upstream transcript variant	1.66e-30	1.13e-21	..	..	..
ARG1	rs2781668	Downstream transcript variant	..	9.887e-08	6.4e-06	..	9.87e-07
CCNH	rs7719891	Intron	0.0002487	0.0001286	0.0009	0.007057	..
SPATA20	rs9890200	Upstream transcript variant	..	..	..	..	0.008998
MANBA	rs223489		..	..	..	..	..
MANSC4	rs11049131		..	..	..	..	..
MANBA	rs227370		..	..	..	..	..
ACE	rs4344		..	..	..	..	0.006318
ABO	rs505922		0.006534	0.002467	..	..	1.37e-05
HP	rs217184		0.002803	..	..	..	..
HP	rs77303550		0.003012	..	..	..	..
NELL1	rs16907058		0.0002139	9.55e-07	..	0.0038	8.25e-06
HP	rs217181		0.002628	..	..	..	..
ABO	rs492488		0.007869	0.003037	..	..	2.01e-05
ERO1LB	rs1254194	Intron	..	..	..	..	..
MICB	rs2855812		2.489e-05	..	..	0.0097	..
GDF15	rs45543339		0.009801	9.47e-09	..	..	1.15e-08
SVEP1	rs61751937		..	..	..	..	..
SVEP1	rs78742138		..	..	0.003951	..	..
CDON	rs60929339		..	..	..	..	..
CDON	rs3740909		..	..	..	..	..
KDR	rs2305948		..	..	..	0.0077	..
CYB5A	rs7239618	Intron	0.0005465	..	..	..	..
C4A-C4B	rs2280774		3.98e-33	..	..	0.0002851	4.41e-05
FGF2	rs308403		7.01e-10	..	..	..	..
